# Supplementary material for: Terzyme: a tool for identification and analysis of the plant terpenome
Source: Plant Methods. 2018 Jan 10;14:4. doi: 10.1186/s13007-017-0269-0 (PMC5761147; doi:10.1186/s13007-017-0269-0)
Supplement: Supplementary file 2 — Additional file 2: Table 2. Positive Dataset for training profile HMMs. A detailed list of accession IDs for each sequence used in the GB dataset [file 13007_2017_269_MOESM2_ESM.xlsx]

## Sheet: tpsa
Additional File 2: Supplementary Table 2: The GF Dataset. This File has Six Sheets, with data for each of the Gene family Based TPS Sub-Class. Sheet Names as well as the first row of each sheet shows the Sub-family. This sheet is for Sub-family TPSa. It has three columns, Gene Accession ID, Protein name or data source, and Species.
Accession/Locus id	Protein	Organism
EER92135.1	SORBIDRAFT_01g032610	Sorghum bicolor
EER92232.1	SORBIDRAFT_01g034700	Sorghum bicolor
EER92276.1	SORBIDRAFT_01g035460	Sorghum bicolor
EER93841.1	SORBIDRAFT_01g015070	Sorghum bicolor
EES08559.1	SORBIDRAFT_05g019210	Sorghum bicolor
EES09506.1	SORBIDRAFT_05g006470	Sorghum bicolor
EES13001.1	SORBIDRAFT_06g031270	Sorghum bicolor
EES13421.1	SORBIDRAFT_07g004470	Sorghum bicolor
EES13422.1	SORBIDRAFT_07g004485	Sorghum bicolor
EES14161.1	SORBIDRAFT_07g025700	Sorghum bicolor
EES14523.1	SORBIDRAFT_07g003080	Sorghum bicolor
EES14619.1	SORBIDRAFT_07g004480	Sorghum bicolor
EES14660.1	SORBIDRAFT_07g005130	Sorghum bicolor
EES15026.1	SORBIDRAFT_07g020980	Sorghum bicolor
EES18865.1	SORBIDRAFT_09g000990	Sorghum bicolor
GSVIVT01014175001	delta-cadinene synthase	Vitis vinifera
GSVIVT01014323001	delta-cadinene synthase	Vitis vinifera
GSVIVT01014324001	delta-cadinene synthase	Vitis vinifera
GSVIVT01014325001	delta-cadinene synthase	Vitis vinifera
GSVIVT01014557001	delta-cadinene synthase	Vitis vinifera
GSVIVT01014558001	delta-cadinene synthase	Vitis vinifera
GSVIVT01014566001	delta-cadinene synthase	Vitis vinifera
GSVIVT01014569001	delta-cadinene synthase	Vitis vinifera
GSVIVT01036308001	delta-cadinene synthase	Vitis vinifera
GSVIVT01036312001	delta-cadinene synthase	Vitis vinifera
GSVIVT01036313001	delta-cadinene synthase	Vitis vinifera
GSVIVT01036315001	delta-cadinene synthase	Vitis vinifera
GSVIVT01036317001	delta-cadinene synthase	Vitis vinifera
GSVIVT01036320001	delta-cadinene synthase	Vitis vinifera
GSVIVT01036322001	delta-cadinene synthase	Vitis vinifera
GSVIVT01036330001	delta-cadinene synthase	Vitis vinifera
GSVIVT01036343001	delta-cadinene synthase	Vitis vinifera
GSVIVT01036344001	delta-cadinene synthase	Vitis vinifera
GSVIVT01036348001	delta-cadinene synthase	Vitis vinifera
GSVIVT01036351001	delta-cadinene synthase	Vitis vinifera
GSVIVT01036360001	delta-cadinene synthase	Vitis vinifera
GSVIVT01036361001	delta-cadinene synthase	Vitis vinifera
GSVIVT01036366001	delta-cadinene synthase	Vitis vinifera
GSVIVT01036367001	delta-cadinene synthase	Vitis vinifera
GSVIVT01036370001	delta-cadinene synthase	Vitis vinifera
GSVIVT01036372001	delta-cadinene synthase	Vitis vinifera
GSVIVT01036374001	delta-cadinene synthase	Vitis vinifera
GSVIVT01036376001	delta-cadinene synthase	Vitis vinifera
LOC_Os01g23530.1	terpene synthase	Populus trichocarpa
LOC_Os01g42610.1	terpene synthase	Populus trichocarpa
LOC_Os03g22634.1	terpene synthase	Populus trichocarpa
LOC_Os03g24640.1	terpene synthase	Populus trichocarpa
LOC_Os03g24680.1	terpene synthase	Populus trichocarpa
LOC_Os03g24690.1	terpene synthase	Populus trichocarpa
LOC_Os03g31430.1	terpene synthase	Populus trichocarpa
LOC_Os04g26960.1	terpene synthase	Populus trichocarpa
LOC_Os04g27070.1	terpene synthase	Populus trichocarpa
LOC_Os04g27190.1	terpene synthase	Populus trichocarpa
LOC_Os04g27340.1	terpene synthase	Populus trichocarpa
LOC_Os04g27400.1	terpene synthase	Populus trichocarpa
LOC_Os04g27540.1	terpene synthase	Populus trichocarpa
LOC_Os04g27720.1	terpene synthase	Populus trichocarpa
LOC_Os04g27790.1	terpene synthase	Populus trichocarpa
LOC_Os07g11790.1	terpene synthase	Populus trichocarpa
LOC_Os08g04500.1	terpene synthase	Populus trichocarpa
LOC_Os08g07080.1	terpene synthase	Populus trichocarpa
LOC_Os08g07100.1	terpene synthase	Populus trichocarpa
O22184	terpenoid synthase 5	Arabidopsis thaliana
O23651	Terpenoid synthase 1	Arabidopsis thaliana
O65434	terpenoid synthase 7	Arabidopsis thaliana
O65435	Terpenoid synthase 8	Arabidopsis thaliana
POPTR_0001s44080.1	TPS protein	Populus trichocarpa
POPTR_0005s09830.1	TPS protein	Populus trichocarpa
POPTR_0007s07360.1	TPS protein	Populus trichocarpa
POPTR_0007s07410.1	TPS protein	Populus trichocarpa
POPTR_0011s14600.1	TPS protein	Populus trichocarpa
POPTR_0015s05270.1	TPS protein	Populus trichocarpa
POPTR_0015s09710.1	TPS protein	Populus trichocarpa
POPTR_0019s01320.1	Terpene synthase/cyclase family protein	Populus trichocarpa
POPTR_0019s03350.1	TPS protein	Populus trichocarpa
POPTR_0019s03990.1	TPS protein	Populus trichocarpa
POPTR_0019s06190.1	Casbene synthase / Casbene synthetase	Populus trichocarpa
POPTR_0019s06220.1	Casbene synthase / Casbene synthetase	Populus trichocarpa
POPTR_0121s00250.1	TPS protein	Populus trichocarpa
POPTR_0408s00200.1	TPS protein	Populus trichocarpa
Q40577	5-epi-aristolochene synthase	Nicotiana tabacum
Q84UU4	Alpha-humulene/(-)-(E)-beta-caryophyllene synthase	Arabidopsis thaliana
Q84UU9	Terpenoid synthase 6	Arabidopsis thaliana
Q8L7G4	Terpenoid synthase 9	Arabidopsis thaliana
Q9C6W6	Terpenoid synthase 29	Arabidopsis thaliana
Q9C748	Terpenoid synthase 28	Arabidopsis thaliana
Q9C8E3	Terpenoid synthase 26	Arabidopsis thaliana
Q9FI27	Terpenoid synthase 20	Arabidopsis thaliana
Q9LH31	Terpenoid synthase 30	Arabidopsis thaliana
Q9LIA1	Terpenoid synthase 25	Arabidopsis thaliana
Q9LQ27	Terpenoid synthase 22	Arabidopsis thaliana
Q9LRR2	Terpenoid synthase 17	Arabidopsis thaliana
Q9LS76	Terpenoid synthase 15	Arabidopsis thaliana
Q9LUE0	Terpenoid synthase 19	Arabidopsis thaliana
Q9LUE2	Terpenoid synthase 18	Arabidopsis thaliana
Q9LVP7	terpenoid synthase 16	Arabidopsis thaliana
Q9T0J9	(Z)-gamma-bisabolene synthase 1	Arabidopsis thaliana
Q9T0K1	(Z)-gamma-bisabolene synthase 2	Arabidopsis thaliana
Q9ZV48	Probable alpha,alpha-trehalose-phosphate synthase [UDP-forming] 11	Arabidopsis thaliana
JN412092	TPS12 protein	Solanum lycopersicum
JN412093	TPS10 protein	Solanum lycopersicum
JN408289	TPS9 protein	Solanum lycopersicum
JN412091	TPS14	Solanum lycopersicum
JN412089	TPS17 protein	Solanum lycopersicum
JN412090	TPS16 protein	Solanum lycopersicum
JN412078	TPS36 protein	Solanum lycopersicum
JN412079	TPS35 protein	Solanum lycopersicum
JN412080	TPS33 protein	Solanum lycopersicum
JN412081	TPS32 protein	Solanum lycopersicum
JN412082	TPS31 protein	Solanum lycopersicum
JN412083	TPS28 protein	Solanum lycopersicum
Protein	Source	Organism
TPS13	http://www.plantphysiol.org/content/plantphysiol/suppl/2011/08/03/pp.111.179648.DC1/179648Supplemental.pdf	Solanum lycopersicum
TPS15 protein	http://www.plantphysiol.org/content/plantphysiol/suppl/2011/08/03/pp.111.179648.DC1/179648Supplemental.pdf	Solanum lycopersicum

## Sheet: tpsb
Supplementary Table 2: This File has Six Sheets, with data for each of the Gene family Based TPS Sub-Class. Sheet Names as well as the first row of each sheet shows the Sub-family. This sheet is for Sub-family TPSb. It has three columns, Gene Accession ID, Protein name or data source,and Species.
Accession/Locus id	Protein	Organism
2J5C (PDB)	monoterpene synthase	Salvia fruticosa
A4FVP2	Tricyclene synthase, chloroplastic OS	Arabidopsis thaliana
AAC37366.1	4S-limonene synthase	Mentha spicata
AAX16078.1	monoterpene synthase	Perilla citriodora
ABR09291.1	monoterpene synthase	Zea mays
ACF24767.1	monoterpene synthase	Santalum album
BAD91045.1	monoterpene synthase	Citrus unshiu
BAF02831.1	monoterpene synthase	Eucalyptus globulus
EER95071.1	TPS protein	Sorghum bicolor
EES11856.1	TPS protein	Sorghum bicolor
F6M8I0.1	Monoterpene synthase	Santalum album
GSVIVT01000401001	myrcene synthase	Vitis vinifera
GSVIVT01000402001	myrcene synthase	Vitis vinifera
GSVIVT01006399001	myrcene synthase	Vitis vinifera
GSVIVT01006642001	myrcene synthase	Vitis vinifera
GSVIVT01013515001	myrcene synthase	Vitis vinifera
GSVIVT01013517001	myrcene synthase	Vitis vinifera
GSVIVT01013518001	myrcene synthase	Vitis vinifera
GSVIVT01030646001	myrcene synthase	Vitis vinifera
GSVIVT01030647001	myrcene synthase	Vitis vinifera
GSVIVT01033458001	myrcene synthase	Vitis vinifera
NP_001106050.1	monoterpene synthase	Zea mays
O81192.1	(+)-bornyl diphosphate synthase, chloroplastic; Short=BPPS	Salvia fruticosa
P0CJ43	(E)-beta-ocimene synthase, chloroplastic OS	Arabidopsis thaliana
P0DI76	1,8-cineole synthase 1, chloroplastic OS	Arabidopsis thaliana
P0DI77	1,8-cineole synthase 2, chloroplastic OS	Arabidopsis thaliana
POPTR_0001s31550.1	TPS protein	Populus trichocarpa
POPTR_0001s31570.1	TPS protein	Populus trichocarpa
POPTR_0001s31580.1	TPS protein	Populus trichocarpa
POPTR_0007s02810.1	TPS protein	Populus trichocarpa
POPTR_0007s02920.1	TPS protein	Populus trichocarpa
POPTR_0011s03440.1	TPS protein	Populus trichocarpa
POPTR_0017s06920.1	TPS protein	Populus trichocarpa
POPTR_0019s01270.1	TPS protein	Populus trichocarpa
POPTR_0019s01290.1	TPS protein	Populus trichocarpa
POPTR_0019s01340.1	Terpene synthase/cyclase family protein	Populus trichocarpa
POPTR_0019s03980.1	TPS protein	Populus trichocarpa
POPTR_0092s00200.1	TPS protein	Populus trichocarpa
Q9LRZ6	Beta-myrcene/(E)-beta-ocimene synthase 2, chloroplastic OS	Arabidopsis thaliana
Q9ZUH4	Tricyclene synthase, chloroplastic OS	Arabidopsis thaliana
JN408286	TPS5 protein	Solanum lycopersicum
JN408285	TPS4 protein	Solanum lycopersicum
JN408284	TPS3 protein	Solanum lycopersicum
JN408288	TPS8 protein	Solanum lycopersicum
JN408287	TPS7 protein	Solanum lycopersicum
JN412085	TPS25 protein	Solanum lycopersicum
JN412076	TPS38 protein	Solanum lycopersicum
Protein	Source	Organism
TPS6 protein	http://www.plantphysiol.org/content/plantphysiol/suppl/2011/08/03/pp.111.179648.DC1/179648Supplemental.pdf	Solanum lycopersicum
TPS1 hypothetical protein	http://www.plantphysiol.org/content/plantphysiol/suppl/2011/08/03/pp.111.179648.DC1/179648Supplemental.pdf	Solanum lycopersicum

## Sheet: tpsc
Supplementary Table 2: This File has Six Sheets, with data for each of the Gene family Based TPS Sub-Class. Sheet Names as well as the first row of each sheet shows the Sub-family. This sheet is for Sub-family TPSc. It has three columns, Gene Accession ID, Protein name or data source,and Species.
Accession/Locus id	Protein	Organism
AAD04293.1	copalyl diphosphate synthase 2	Cucurbita maxima
AAT70083.1	ent-copalyl diphosphate synthase	Zea mays
ABV57835.1	copalyl diphosphate synthase	Salvia miltiorrhiza
ADB55707.1	ent-copalyl diphosphate synthase	Picea glauca
ADO61012.1	copalyl diphosphate synthase	Helianthus annuus
AEF32082.1	copalyl diphosphate synthase	Castanea mollissima
AEP03176.1	copalyl diphosphate synthase	Isodon eriocalyx
AEP03177.1	copalyl diphosphate synthase	Isodon eriocalyx
AET03601.1	Copalyl diphosphate synthase	Medicago truncatula
AEZ55684.1	copalyl diphosphate synthase 2	Salvia miltiorrhiza
AFE61356.1	copalyl diphosphate synthase	Taiwania cryptomerioides
BAC54040.1	copalyl diphosphate synthase	Cucumis sativus
BAC76429.1	copalyl diphosphate synthase	Cucurbita maxima
BAD51455.1	copalyl diphosphate synthase	Nicotiana tabacum
BAF61135.1	ent-kaurene synthase	Physcomitrella patens
BAH04190.1	GA1	Cardamine nipponica
BAH56558.1	ent-copalyl diphosphate synthase	Triticum aestivum
BAH56559.1	ent-copalyl diphosphate synthase	Triticum aestivum
BAH56560.1	ent-copalyl diphosphate synthase	Triticum aestivum
CBL42915.1	copalyldiphosphate synthase	Helianthus annuus
EER91623.1	SORBIDRAFT_01g021990	Sorghum bicolor
EFJ31963.1	SELMODRAFT_144572	Selaginella moellendorffii
EFJ31965.1	copalyl diphosphate synthase	Selaginella moellendorffii
EFJ37888.1	copalyl diphosphate synthase	Selaginella moellendorffii
GSVIVT01001153001	GSVIVT01001153001	Vitis vinifera
GSVIVT01001155001	GSVIVT01001155001	Vitis vinifera
JN412073	TPS41 protein	Solanum lycopersicum
JN412074	TPS40_CPS1 protein	Solanum lycopersicum
LOC_Os02g17780.1	Ent-copalyl diphosphate synthase 1	Oryza sativa
LOC_Os02g36210.1	Ent-copalyl diphosphate synthase 2	Oryza sativa
LOC_Os04g09900.1	Syn-copalyl diphosphate synthase	Oryza sativa
POPTR_0002s05300.1	Ent-kaurene synthase A family protein	Populus trichocarpa
POPTR_0005s23190.1	TPS protein	Populus trichocarpa
Q38802	Ent-copalyl diphosphate synthase	Arabidopsis thaliana
XP_003621307.1	Copalyl diphosphate synthase, partial	Medicago truncatula

## Sheet: tpsd
Supplementary Table 2: This File has Six Sheets, with data for each of the Gene family Based TPS Sub-Class. Sheet Names as well as the first row of each sheet shows the Sub-family. This sheet is for Sub-family TPSd. It has three columns, Gene Accession ID, Protein name or data source,and Species.
Accession/Locus id	Protein	Organism
C0PPM5	Alpha-longipinene synthase	Picea sitchensis
C0PPR1	(-)-linalool synthase	Picea sitchensis
C0PT35	1,8-cineole synthase	Picea sitchensis
C0PTH8	(-)-beta-phellandrene synthase	Picea sitchensis
F1CKI6	Carene synthase 1, chloroplastic	Picea sitchensis
F2XF92	Isopimaradiene synthase	Picea sitchensis
F2XF93	(-)-linalool synthase	Picea glauca
F2XF94	(+)-3-carene synthase	Picea engelmannii x Picea glauca
F2XF95	(-)-alpha/beta-pinene synthase (Fragment)	Picea glauca
F2XF96	(-)-alpha/beta-pinene synthase (Fragment)	Picea glauca
F2XF97	Alpha-humulene synthase	Picea glauca
F2XF98	1,8-cineole synthase	Picea engelmannii x Picea glauca
F2XF99	(E,E)-alpha-farnesene synthase/(E)-beta-ocimene synthase	Picea eng
F2XFA0	Longifolene synthase	Picea engelmannii x Picea glauca
F2XFA1	(-)-beta-phellandrene synthase	Picea sitchensis
F2XFA2	1,8-cineole synthase	Picea glauca
F2XFA4	(-)-beta-phellandrene synthase	Picea sitchensis
F2XFA5	(-)-beta-phellandrene synthase	Picea sitchensis
F2XFA6	(-)-linalool synthase	Picea sitchensis
F2XFA8	(-)-alpha/beta-pinene synthase	Picea sitchensis
F2XFB2	Levopimaradiene/abietadiene synthase	Picea sitchensis
O22340	Limonene synthase, chloroplastic	Abies grandis
O24474	Myrcene synthase, chloroplastic	Abies grandis
O24475	Pinene synthase, chloroplastic	Abies grandis
O64404	Delta-selinene synthase	Abies grandis
O64405	Gamma-humulene synthase	Abies grandis
O81086	Alpha-bisabolene synthase	Abies grandis
Q38710	Abietadiene synthase, chloroplastic	Abies grandis
Q41594	axadiene synthase	Taxus brevifolia
Q675K8	E,E-alpha-farnesene synthase	Picea abies
Q675K9	Myrcene synthase	Picea abies
Q675L0	Longifolene synthase	Picea abies
Q675L1	(-)-limonene synthase	Picea abies
Q675L2	(-)-linalool synthase	Picea abies
Q675L3	(-)-alpha/beta-pinene synthase (Fragment)	Picea abies
Q675L4	Levopimaradiene synthase, chloroplastic	Picea abies
Q675L5	Isopimaradiene synthase, chloroplastic	Picea abies
Q675L6	E-alpha-bisabolene synthase	Picea abies
Q6XDB5	Pinene synthase, chloroplastic	Picea sitchensis
Q84KL3	(+)-alpha-pinene synthase, chloroplastic	Pinus taeda
Q84KL4	(-)-alpha-terpineol synthase, chloroplastic	Pinus taeda
Q84KL5	Alpha-farnesene synthase	Pinus taeda
Q84KL6	(-)-alpha-pinene synthase, chloroplastic	Pinus taeda
Q947C4	Levopimaradiene synthase, chloroplastic	Ginkgo biloba
Q948Z0	Camphene synthase, chloroplastic	Abies grandis
Q9M7C9	Limonene/alpha-pinene synthase, chloroplastic	Abies grandis
Q9M7D0	Terpinolene synthase, chloroplastic	Abies grandis
Q9M7D1	Beta-phellandrene synthase, chloroplastic	Abies grandis

## Sheet: tpse_f
Supplementary Table 2: This File has Six Sheets, with data for each of the Gene family Based TPS Sub-Class. Sheet Names as well as the first row of each sheet shows the Sub-family. This sheet is for Sub-family TPSe-f. It has three columns, Gene Accession ID, Protein name or data source,and Species.
Accession/Locus id	Protein	Organism
POPTR_0008s08220.1	ent-kaurene synthase	Populus trichocarpa
POPTR_0008s08190.1	ent-kaurene synthase	Populus trichocarpa
POPTR_0004s03810.1	geranyllinalool synthase	Populus trichocarpa
LOC_Os12g30824.1	terpene synthase	Oryza sativa
LOC_Os12g30800.1	ent-kaurene synthase B, chloroplast precursor, M	Oryza sativa
LOC_Os11g28530.2	terpene synthase	Oryza sativa
LOC_Os09g15050.1	ent-kaurene synthase B, chloroplast precursor, M	Oryza sativa
LOC_Os04g52240.1	terpene synthase	Oryza sativa
LOC_Os04g52230.1	ent-kaurene synthase B, chloroplast precursor, M	Oryza sativa
LOC_Os04g52210.1	terpene synthase	Oryza sativa
LOC_Os04g10060.1	ent-kaurene synthase B, chloroplast precursor, M	Oryza sativa
LOC_Os02g36264.1	terpene synthase	Oryza sativa
LOC_Os02g36220.1	terpene synthase	Oryza sativa
LOC_Os02g36140.2	terpene synthase	Oryza sativa
GSVIVT01036724001	ent-kaurene synthase	Vitis vinifera
GSVIVT01006955001	S-linalool synthase	Vitis vinifera
GSVIVT01006342001	S-linalool synthase	Vitis vinifera
GSVIVT01004411001	S-linalool synthase	Vitis vinifera
GSVIVT01002351001	S-linalool synthase	Vitis vinifera
BAB12441.1	ent-kaurene synthase No1	Lactuca sativa
Q96376.1	S-linalool synthase	Clarkia breweri
Q93YV0.1	(E,E)-geranyllinalool synthase; AltName: Full=Terpenoid synthase 4; Short=AtTPS04	Clarkia breweri
Q9SAK2.1	Ent-kaur-16-ene synthase, chloroplastic; AltName: Full=Ent-kaurene synthase; Short=AtKS; AltName: Full=Ent-kaurene synthase B; Short=KSB; AltName: Full=Protein GA REQUIRING 2; Flags: Precursor	Arabidopsis thaliana
AAD34294.1	kaurene synthase	Stevia rebaudiana
AAD19841.1	linalool synthase-like protein	Oenothera californica subsp. arizonica
AAD19840.1	linalool synthase 2	Clarkia breweri
AAD19839.1	linalool synthase	Clarkia concinna
AAD19838.1	linalool synthase 1	Clarkia breweri
AFG18184.1	ent-kaurene synthase	Malus x domestica
BAL41693.1	ent-kaurene synthase like 6	Triticum aestivum
BAL41690.1	ent-kaurene synthase like 3	Triticum aestivum
XP_003600343.1	Ent-kaur-16-ene synthase	Medicago truncatula
XP_003593505.1	S-linalool synthase	Medicago truncatula
XP_003593502.1	S-linalool synthase	Medicago truncatula
AEN74904.1	ent-kaurene synthase	Pyrus communis
AEF32083.1	ent-kaurene synthase	Castanea mollissima
ADZ55290.1	ent-kaurene synthase	Triticum aestivum
ADB55711.1	(-)-ent-kaurene synthase	Picea glauca
ADB55710.1	(-)-ent-kaurene synthase	Picea sitchensis
XP_002533694.1	Ent-kaurene synthase B, chloroplast precursor,	Ricinus communis
XP_002525841.1	Ent-kaurene synthase B, chloroplast precursor,	Ricinus communis
EES11409.1	SORBIDRAFT_06g028220	Sorghum bicolor
EES11408.1	SORBIDRAFT_06g028210	Sorghum bicolor
EES08722.1	SORBIDRAFT_05g022320	Sorghum bicolor
BAB19275.1	ent-kaurene synthase	Cucumis sativus
JN412086	TPS24 protein	Solanum lycopersicum
JN412087	TPS21 protein	Solanum lycopersicum
FJ797957	TPS20_PHS1 protein	Solanum lycopersicum
JN412072	TPS19 protein	Solanum lycopersicum
JN412088	TPS18 protein	Solanum lycopersicum

## Sheet: tpsg
Additinal File 2: Supplementary Table 2: This File has Six Sheets, with data for each of the Gene family Based TPS Sub-Class. Sheet Names as well as the first row of each sheet shows the Sub-family. This sheet is for Sub-family TPSg. It has three columns, Gene Accession ID, Protein name or data source,and Species.
Accession	Protein	Organism
AAO41726.1	myrcene synthase Oc15	Antirrhinum majus
AAO41727.1	myrcene synthase 1e20	Antirrhinum majus
ABR24417.1	nerolidol/linalool synthase 1	Antirrhinum majus
ABR24418.1	nerolidol/linalool synthase 2	Antirrhinum majus
AER36088.1	nerolidol synthase	Actinidia chinensis
AES67304.1	Myrcene synthase	Medicago truncatula
AES67305.1	Myrcene synthase	Medicago truncatula
EES04392.1	SORBIDRAFT_04g001780	Sorghum bicolor
EES04394.1	SORBIDRAFT_04g001800	Sorghum bicolor
GSVIVT01000410001	myrcene synthase	Vitis vinifera
GSVIVT01000414001	myrcene synthase	Vitis vinifera
GSVIVT01002718001	(+)-delta-cadinene synthase	Vitis vinifera
GSVIVT01005217001	myrcene synthase	Vitis vinifera
GSVIVT01005221001	myrcene synthase	Vitis vinifera
GSVIVT01005268001	myrcene synthase	Vitis vinifera
GSVIVT01005271001	myrcene synthase	Vitis vinifera
GSVIVT01005272001	myrcene synthase	Vitis vinifera
GSVIVT01006467001	myrcene synthase	Vitis vinifera
GSVIVT01006589001	myrcene synthase	Vitis vinifera
GSVIVT01006591001	myrcene synthase	Vitis vinifera
GSVIVT01007468001	(+)-delta-cadinene synthase	Vitis vinifera
LOC_Os02g02930.1	S-(+)-linalool synthase, chloroplastic	Oryza sativa
POPTR_0004s02970.1	TPS protein	Populus trichocarpa
POPTR_0004s02990.1	TPS protein	Populus trichocarpa
Q84NC8.1	Tricyclene synthase 0e23, chloroplastic	Antirrhinum majus
Q84NC9.1	Tricyclene synthase 1e20, chloroplastic	Antirrhinum majus
Q84UV0.2	Terpenoid synthase	Arabidopsis thaliana
JN412075	TPS39 protein	Solanum lycopersicum
JN412077	TPS37 protein	Solanum lycopersicum
XP_003597054.1	Myrcene synthase	Medicago truncatula
Protein	Source	Organism
TPS43(ignoring the deletion and insertion)	http://www.plantphysiol.org/content/plantphysiol/suppl/2011/08/03/pp.111.179648.DC1/179648Supplemental.pdf	Solanum lycopersicum
